# Supplementary material for: A new design of activated carbon membrane air-cathode for wastewater treatment and energy recovery
Source: Royal Society of Chemistry journal article supplement (doi:10.1039/c5ra21892f), 2015-12-22
Supplement: c5ra21892f1.pdf [file c5ra21892f1.pdf]

## **A new design of activated carbon membrane air-cathode for wastewater treatment and energy recovery**

Peng Zhang<sup>a</sup>, Youpeng Qu<sup>b</sup>, Jia Liu<sup>a\*</sup>, Yujie Feng<sup>a\*</sup>

<sup>a</sup>State Key Laboratory of Urban Water Resource and Environment, Harbin Institute of Technology, Harbin, China

<sup>b</sup>School of Life Science and Technology, Harbin Institute of Technology. No. 2 Yikuang Street, Nangang District, Harbin 150080, China

\*Corresponding Author: E-mail: yujief@hit.edu.cn Phone: (86)451-86287017 Fax: (86)451-86287017; E-mail: [jia14921@163.com](mailto:jia14921@163.com)

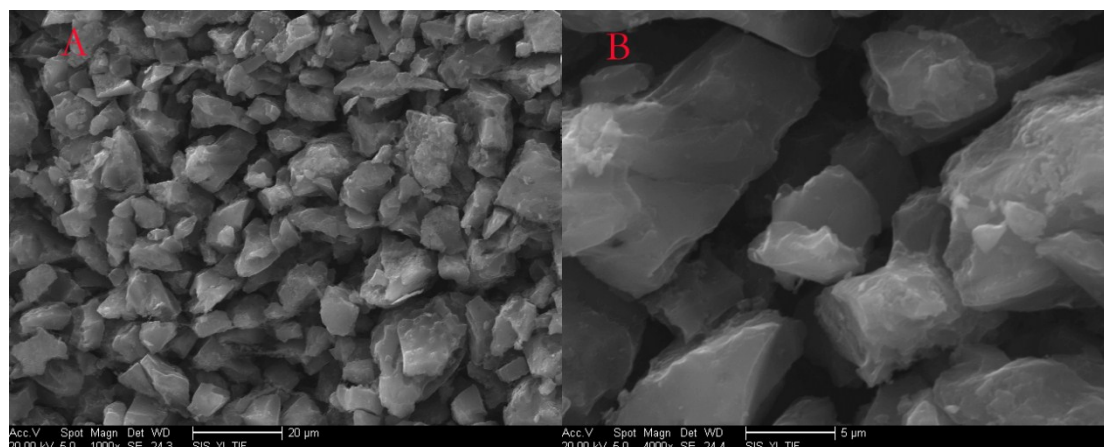

Fig. S1 SEM images of activated carbon layers with the magnitude of 1000 (A) and 4000 (B).

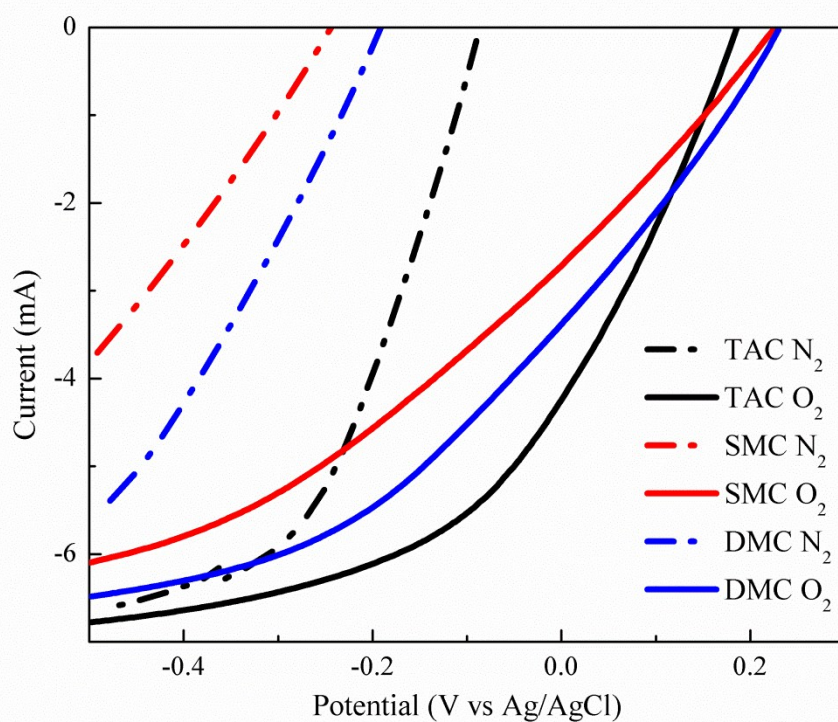

Fig. S2 LSV curves of DMC, SMC and TAC cathode in N<sub>2</sub>-saturated (dash and dot line) and O<sub>2</sub>-saturated (solid line) 50 mM PBS.

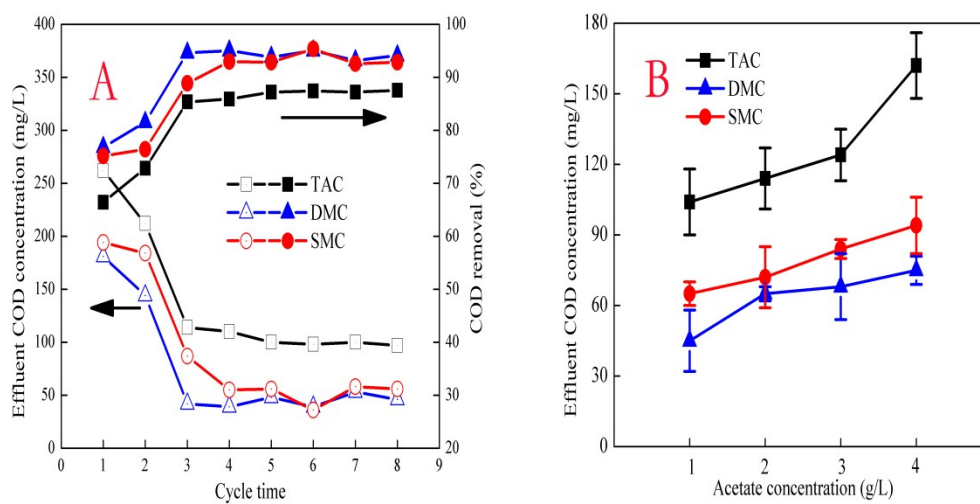

Fig. S3 Effluent COD concentration and COD removal efficiency along with the cycle time (A) and with different organic loading conditions (B).

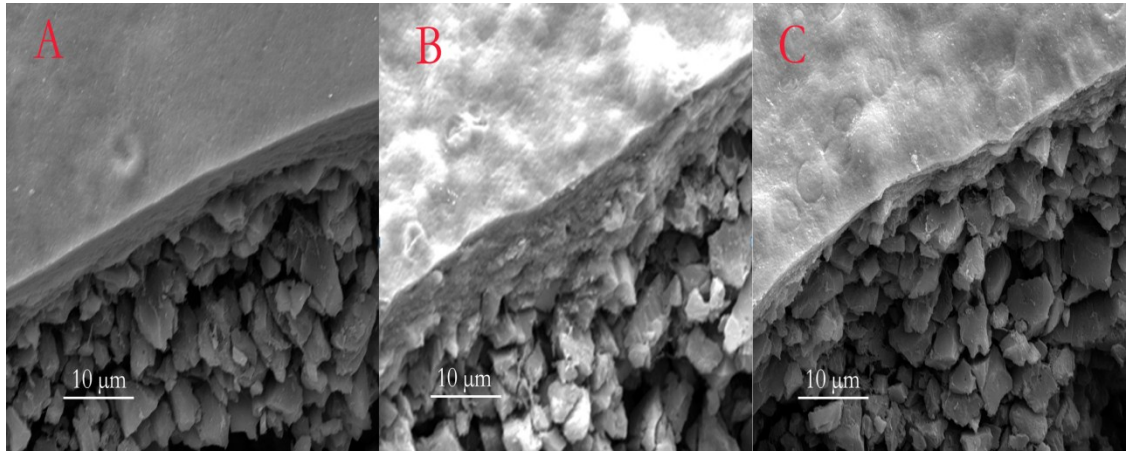

Fig. S4 SEM images of biofilm fouling activated carbon layers of SMC (A), DMC (B) and TAC (C).
